# Supplementary material for: The role of catastrophizing and basic psychological needs satisfaction on health-related quality of life and pain in patients with lumbar disc herniation
Source: Frontiers journal article supplement (doi:10.3389/fpsyg.2023.1147254), 2023-06-22
Supplement: Data_Sheet_1.PDF [file Data_Sheet_1.PDF]

## *Supplementary Material*

# **The Role of Catastrophizing and Basic Psychological Needs Satisfaction on Health-related Quality of Life and Pain in Patients with Lumbar Disc Herniation**

**Daniela Ionescu<sup>1</sup>, Claudia Iuliana Iacob<sup>2\*</sup>, Felix Mircea Brehar<sup>3</sup>, Eugen Avram<sup>2</sup>**

<sup>1</sup> Department of Sociology, National School of Political and Administrative Studies, Bucharest, Romania

<sup>2</sup> Laboratory of Health Psychology and Clinical Neuropsychology, Department of Applied Psychology and Psychotherapy, Faculty of Psychology and Educational Sciences, University of Bucharest, Romania

<sup>3</sup> Department of Neurosurgery, “Carol Davila” University of Medicine and Pharmacy, Bucharest, Romania

\* **Correspondence:** Claudia Iuliana Iacob; e-mail: [claudia-iuliana.iacob@fpse.unibuc.ro](mailto:claudia-iuliana.iacob@fpse.unibuc.ro)

## 1.1 Supplementary Figures

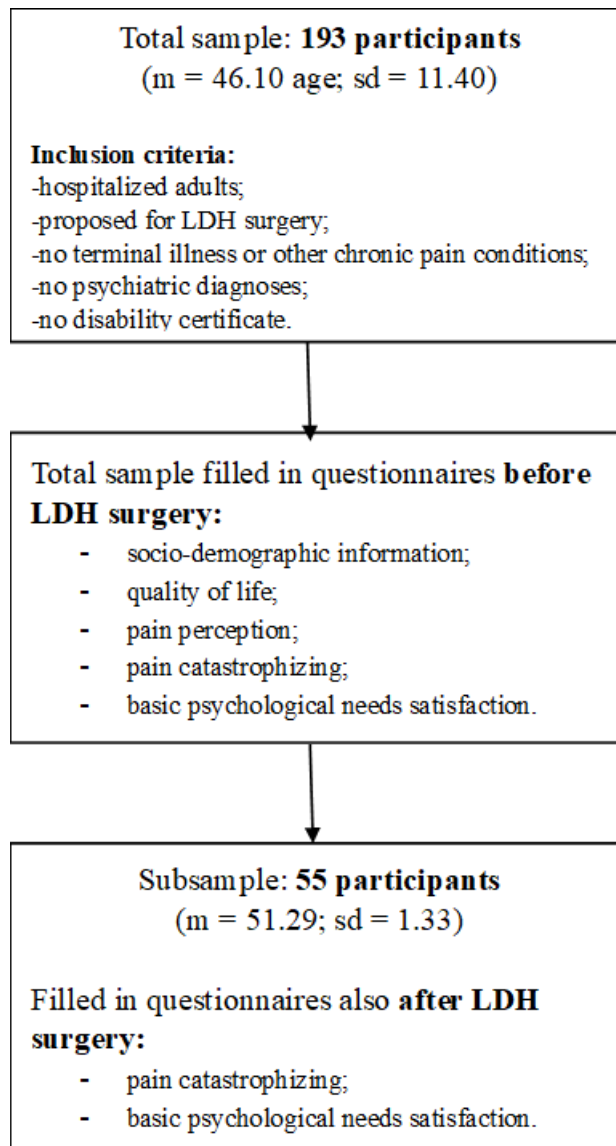

**Supplementary Figure 1.** Flow chart presenting the study's procedure.

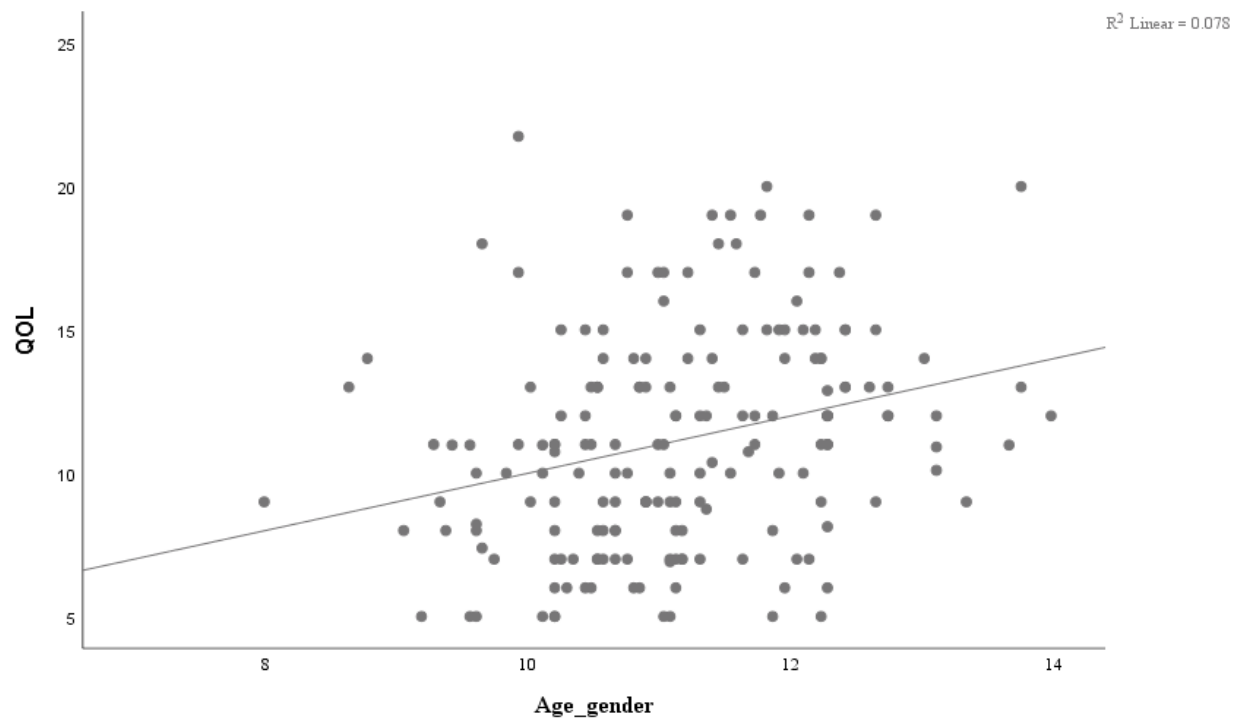

**Supplementary Figure 2.** Scatterplot depicting the relationship between quality of life (QOL) as criterion and the predictors (age and gender) from Step 1 of the hierarchical regression model.

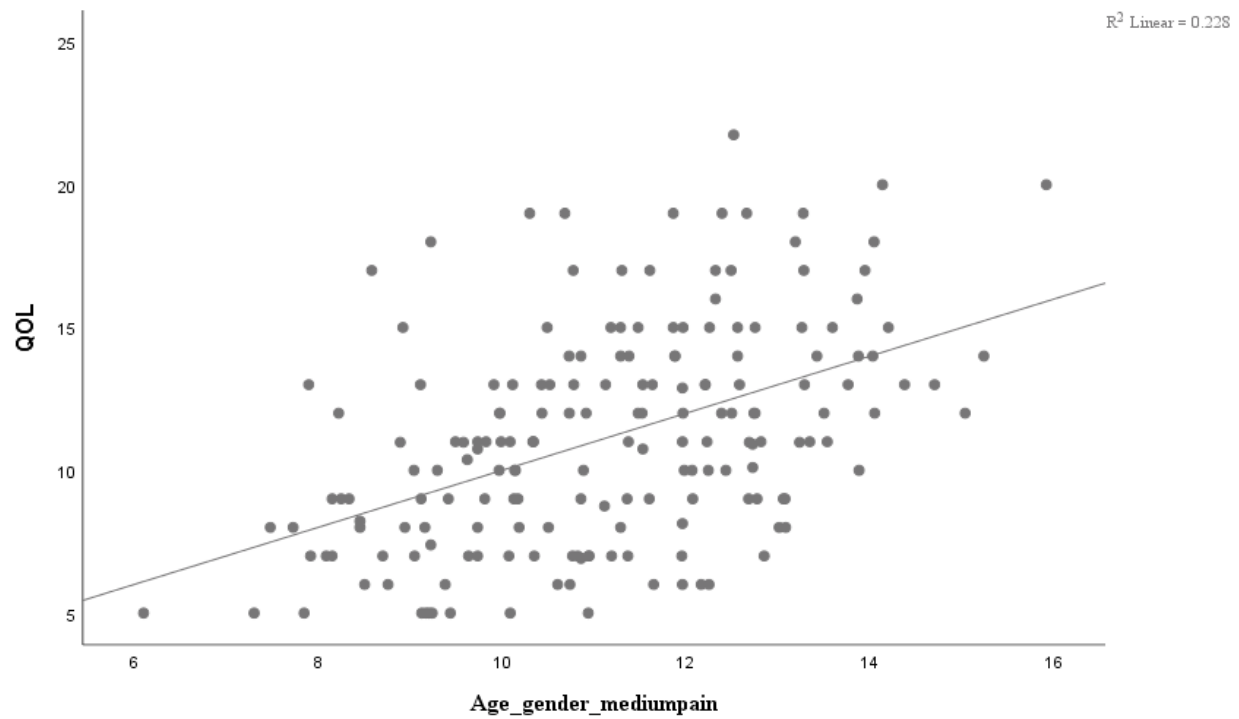

**Supplementary Figure 3.** Scatterplot depicting the relationship between quality of life (QOL) as criterion and the predictors (age, gender, and medium pain) from Step 2 of the hierarchical regression model.

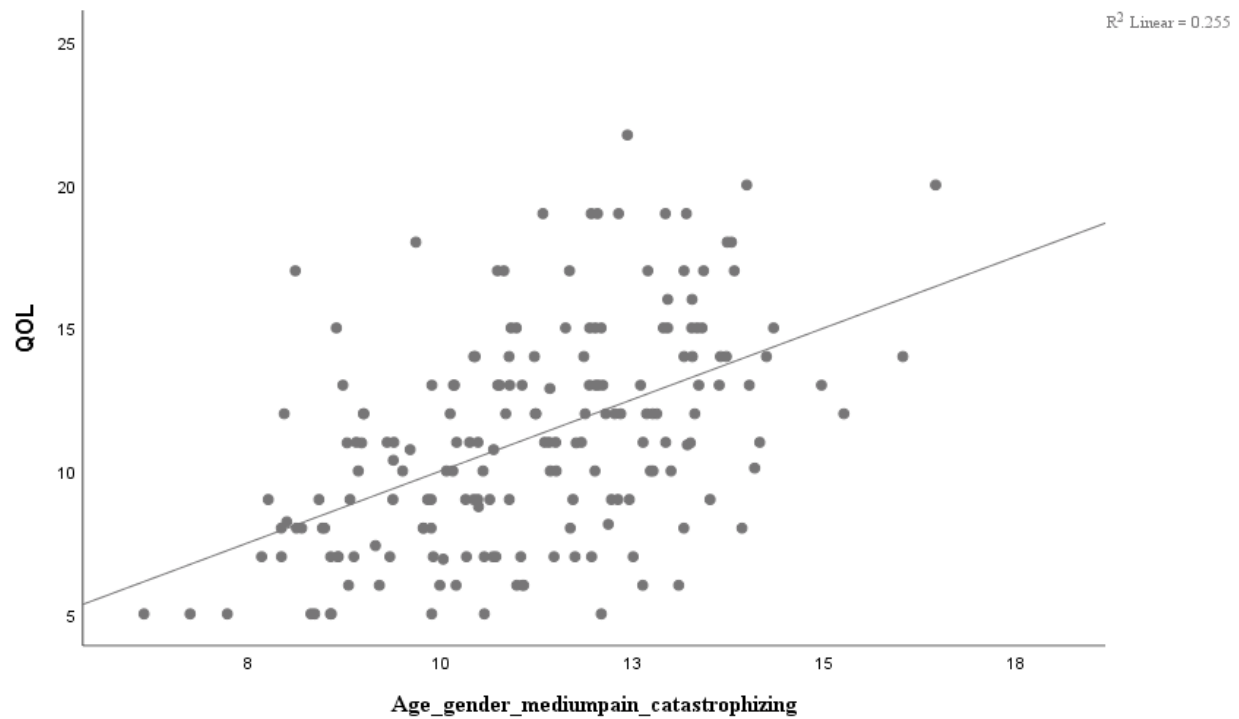

**Supplementary Figure 4.** Scatterplot depicting the relationship between quality of life (QOL) as criterion and the predictors (age, gender, medium pain and pain catastrophizing) from Step 3 of the hierarchical regression model.

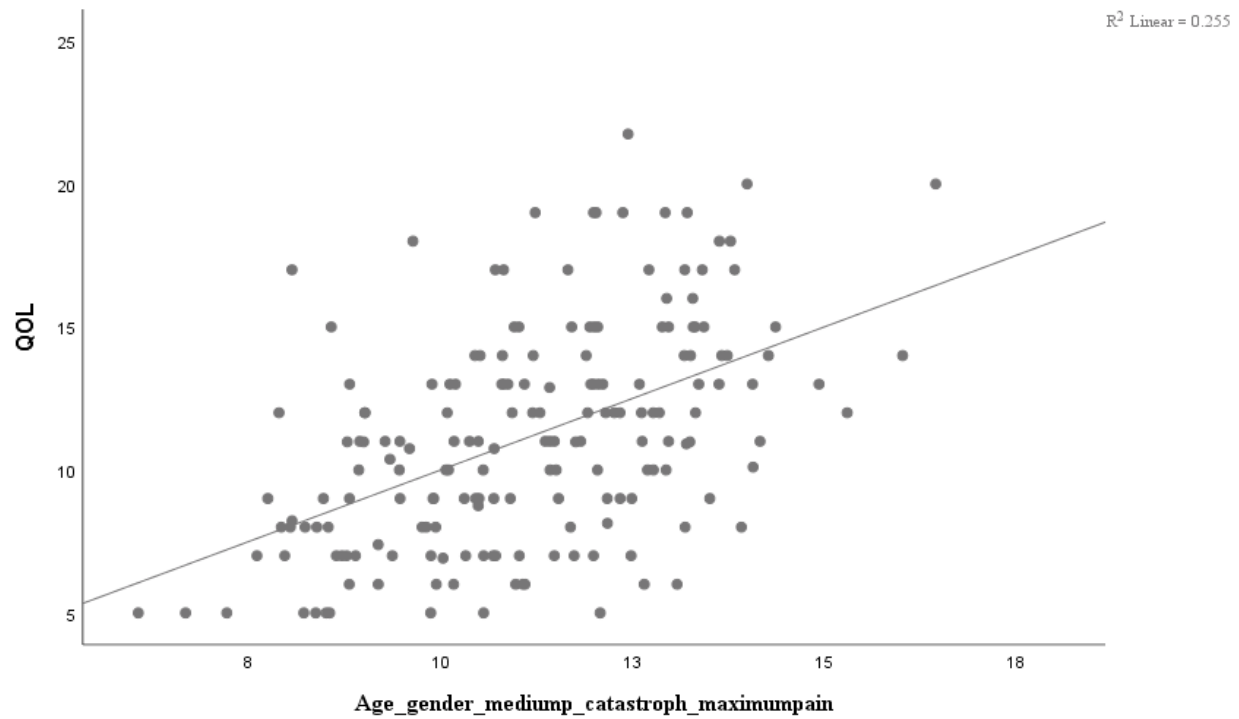

**Supplementary Figure 5.** Scatterplot depicting the relationship between quality of life (QOL) as criterion and the predictors (age, gender, medium pain, pain catastrophizing and maximum pain) from Step 4 of the hierarchical regression model.

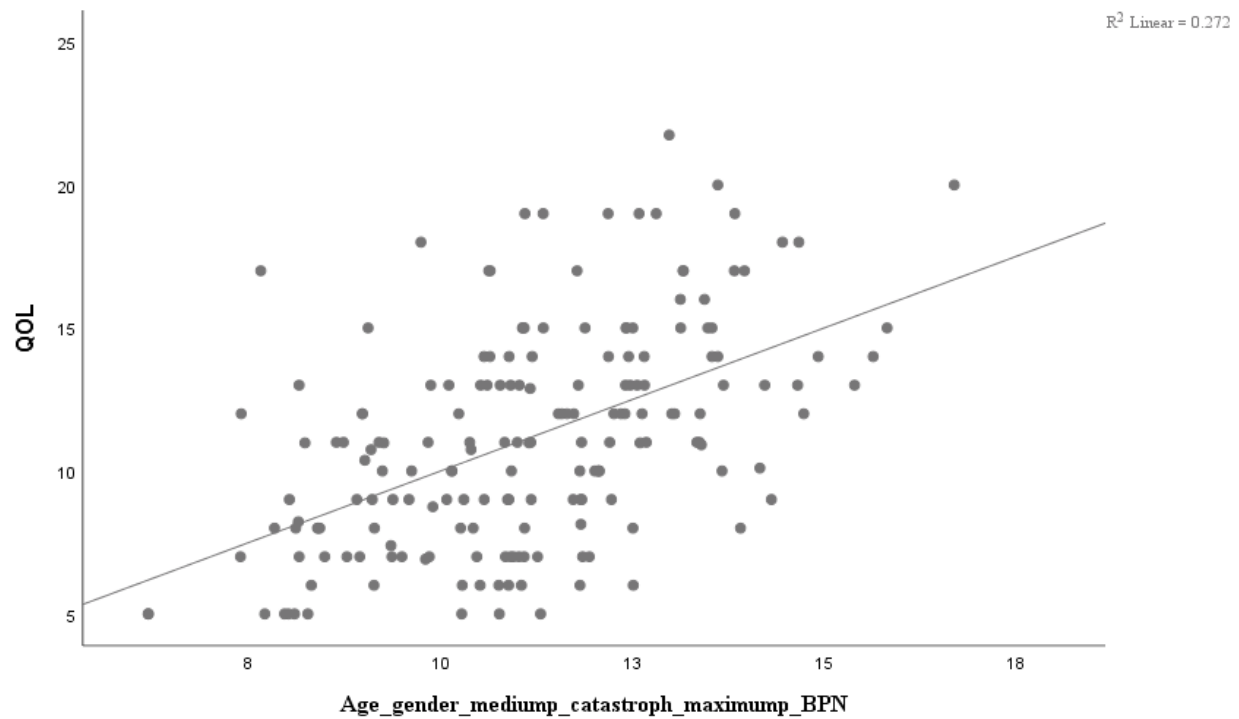

**Supplementary Figure 6.** Scatterplot depicting the relationship between quality of life (QOL) as criterion and the predictors (age, gender, medium pain, pain catastrophizing, maximum pain and basic psychological needs satisfaction) from Step 5 of the hierarchical regression model.
